# Supplementary material for: Prediction of zwitterion hydration and ion association properties using machine learning
Source: Royal Society of Chemistry journal article supplement (doi:10.1039/d3sm00062a), 2023-01-01
Supplement: d3sm00062a1.pdf [file d3sm00062a1.pdf]

## Supporting Information

### Methodology

#### Stability analysis of molecules during molecular dynamics simulations

A sample of the zwitterion chemistries underwent stability analysis, where the root mean-squared displacement (RMSD) during NVT simulation is observed as shown in **Figure S1**. As can be seen that the molecule rapidly enters a steady-state condition with the RMSD leveling off followed by a sudden drop on the far right. This indicates the 10 ns length of NVT simulation is sufficient to achieve molecular stability.

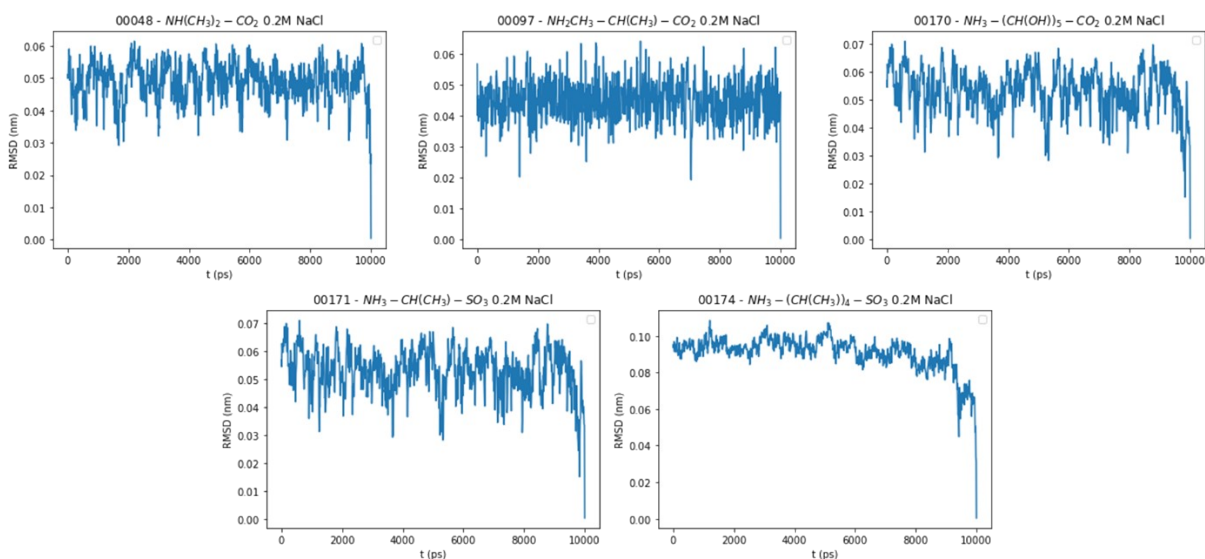

**Figure S1.** Root mean-squared displacement of five sample zwitterions, showing the stability of the molecules during the NVT simulation.

## Lag time selection for effective residence time calculation

Selecting the maximum lag time for calculating the effective residence time,  $\tau$ , is an important task. If the value is too large, then the lack of accuracy of residence time correlation function,  $\bar{C}(t)$ , considerably affects the linear model fit to  $\ln(\bar{C}(t))$  vs  $t$ , thus affecting the calculation of  $\tau$ . If the maximum lag time is too short, it will not capture linear trend of  $\ln(\bar{C}(t))$  vs  $t$ . Figure S2 illustrates a sample of the residence time correlation function,  $\bar{C}(t)$ , for zwitterion labeled 00239 in Table S1.

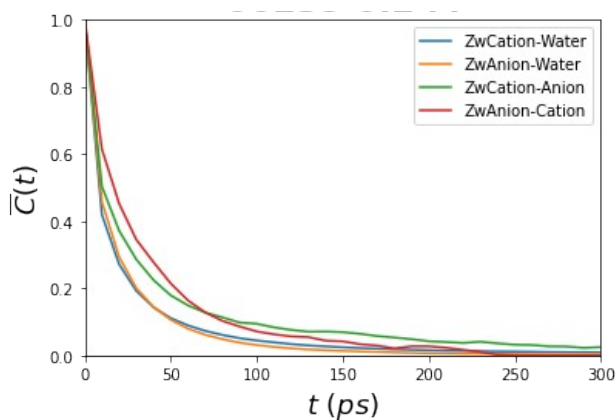

**Figure S2.** A sample residence time correlation function,  $\bar{C}(t)$ , as a function of  $t$ , for zwitterion labeled 00239 in Table S1, in four possible interactions shown in the legend.

## **Cheminformatic descriptor calculations**

*Volume, Surface Area:* The built-in GROMACS<sup>1</sup> function, *gmx sasa*, is used to calculate the van der Waals surface area (nm<sup>2</sup>) and volume (nm<sup>3</sup>) during a simulation. These two descriptors will be used to describe the steric effects on association properties.

*Charge:* Electrostatic interactions are believed to be the predominant influence on zwitterion hydration and ion association.<sup>2</sup> Moiety charges are calculated by summing the partial charges from the topology of all atoms in the respective moiety.

*HBondDonors/Acceptors:* This feature is the number of hydrogen bond donating and accepting sites, and is manually calculated according to the chemistry of the charged moiety.

**Table S1.** Molecule SMILES input to LigParGen.<sup>3</sup> \* indicates the molecule was unstable during simulation and is not included in the data for analysis.

| Molecule | Cation                           | Spacer                              | Anion              | SMILES                                       |
|----------|----------------------------------|-------------------------------------|--------------------|----------------------------------------------|
| 00000    | N(CH <sub>3</sub> ) <sub>3</sub> |                                     | CO <sub>2</sub>    | C[N+](C)(C)C(=O)[O-]                         |
| 00001    | N(CH <sub>3</sub> ) <sub>3</sub> | CH <sub>2</sub>                     | CO <sub>2</sub>    | C[N+](C)(C)CC(=O)[O-]                        |
| 00002    | N(CH <sub>3</sub> ) <sub>3</sub> | (CH <sub>2</sub> ) <sub>2</sub>     | CO <sub>2</sub>    | C[N+](C)(C)CCC(=O)[O-]                       |
| 00003    | N(CH <sub>3</sub> ) <sub>3</sub> | (CH <sub>2</sub> ) <sub>3</sub>     | CO <sub>2</sub>    | C[N+](C)(C)CCCC(=O)[O-]                      |
| 00004    | N(CH <sub>3</sub> ) <sub>3</sub> | (CH <sub>2</sub> ) <sub>4</sub>     | CO <sub>2</sub>    | C[N+](C)(C)CCCCC(=O)[O-]                     |
| 00005    | N(CH <sub>3</sub> ) <sub>3</sub> | (CH <sub>2</sub> ) <sub>5</sub>     | CO <sub>2</sub>    | C[N+](C)(C)CCCCCC(=O)[O-]                    |
| 00006    | N(CH <sub>3</sub> ) <sub>3</sub> | CH(OH)                              | CO <sub>2</sub>    | C[N+](C)(C)C(O)C(=O)[O-]                     |
| 00007    | N(CH <sub>3</sub> ) <sub>3</sub> | (CH(OH)) <sub>2</sub>               | CO <sub>2</sub>    | C[N+](C)(C)C(O)C(O)C(=O)[O-]                 |
| 00008    | N(CH <sub>3</sub> ) <sub>3</sub> | (CH(OH)) <sub>3</sub>               | CO <sub>2</sub>    | C[N+](C)(C)C(O)C(O)C(O)C(=O)[O-]             |
| 00009    | N(CH <sub>3</sub> ) <sub>3</sub> | (CH(OH)) <sub>4</sub>               | CO <sub>2</sub>    | C[N+](C)(C)C(O)C(O)C(O)C(O)C(=O)[O-]         |
| 00010    | N(CH <sub>3</sub> ) <sub>3</sub> | (CH(OH)) <sub>5</sub>               | CO <sub>2</sub>    | C[N+](C)(C)C(O)C(O)C(O)C(O)C(O)C(=O)[O-]     |
| 00011    | N(CH <sub>3</sub> ) <sub>3</sub> | CH(CH <sub>3</sub> )                | CO <sub>2</sub>    | C[N+](C)(C)C(C)C(=O)[O-]                     |
| 00012    | N(CH <sub>3</sub> ) <sub>3</sub> | (CH(CH <sub>3</sub> )) <sub>2</sub> | CO <sub>2</sub>    | C[N+](C)(C)C(C)C(C)C(=O)[O-]                 |
| 00013    | N(CH <sub>3</sub> ) <sub>3</sub> | (CH(CH <sub>3</sub> )) <sub>3</sub> | CO <sub>2</sub>    | C[N+](C)(C)C(C)C(C)C(C)C(=O)[O-]             |
| 00014    | N(CH <sub>3</sub> ) <sub>3</sub> | (CH(CH <sub>3</sub> )) <sub>4</sub> | CO <sub>2</sub>    | C[N+](C)(C)C(C)C(C)C(C)C(C)C(=O)[O-]         |
| 00015    | N(CH <sub>3</sub> ) <sub>3</sub> | (CH(CH <sub>3</sub> )) <sub>5</sub> | CO <sub>2</sub>    | C[N+](C)(C)C(C)C(C)C(C)C(C)C(C)C(=O)[O-]     |
| 00016    | N(CH <sub>3</sub> ) <sub>3</sub> |                                     | SO <sub>3</sub>    | C[N+](C)(C)S(=O)(=O)[O-]                     |
| 00017    | N(CH <sub>3</sub> ) <sub>3</sub> | CH <sub>2</sub>                     | SO <sub>3</sub>    | C[N+](C)(C)CS(=O)(=O)[O-]                    |
| 00018    | N(CH <sub>3</sub> ) <sub>3</sub> | (CH <sub>2</sub> ) <sub>2</sub>     | SO <sub>3</sub>    | C[N+](C)(C)CCS(=O)(=O)[O-]                   |
| 00019    | N(CH <sub>3</sub> ) <sub>3</sub> | (CH <sub>2</sub> ) <sub>3</sub>     | SO <sub>3</sub>    | C[N+](C)(C)CCCS(=O)(=O)[O-]                  |
| 00020    | N(CH <sub>3</sub> ) <sub>3</sub> | (CH <sub>2</sub> ) <sub>4</sub>     | SO <sub>3</sub>    | C[N+](C)(C)CCCCS(=O)(=O)[O-]                 |
| 00021    | N(CH <sub>3</sub> ) <sub>3</sub> | (CH <sub>2</sub> ) <sub>5</sub>     | SO <sub>3</sub>    | C[N+](C)(C)CCCCCS(=O)(=O)[O-]                |
| 00022    | N(CH <sub>3</sub> ) <sub>3</sub> | CH(OH)                              | SO <sub>3</sub>    | C[N+](C)(C)C(O)S(=O)(=O)[O-]                 |
| 00023    | N(CH <sub>3</sub> ) <sub>3</sub> | (CH(OH)) <sub>2</sub>               | SO <sub>3</sub>    | C[N+](C)(C)C(O)C(O)S(=O)(=O)[O-]             |
| 00024    | N(CH <sub>3</sub> ) <sub>3</sub> | (CH(OH)) <sub>3</sub>               | SO <sub>3</sub>    | C[N+](C)(C)C(O)C(O)C(O)S(=O)(=O)[O-]         |
| 00025    | N(CH <sub>3</sub> ) <sub>3</sub> | (CH(OH)) <sub>4</sub>               | SO <sub>3</sub>    | C[N+](C)(C)C(O)C(O)C(O)C(O)S(=O)(=O)[O-]     |
| 00026    | N(CH <sub>3</sub> ) <sub>3</sub> | (CH(OH)) <sub>5</sub>               | SO <sub>3</sub>    | C[N+](C)(C)C(O)C(O)C(O)C(O)C(O)S(=O)(=O)[O-] |
| 00027    | N(CH <sub>3</sub> ) <sub>3</sub> | CH(CH <sub>3</sub> )                | SO <sub>3</sub>    | C[N+](C)(C)C(C)S(=O)(=O)[O-]                 |
| 00028    | N(CH <sub>3</sub> ) <sub>3</sub> | (CH(CH <sub>3</sub> )) <sub>2</sub> | SO <sub>3</sub>    | C[N+](C)(C)C(C)C(C)S(=O)(=O)[O-]             |
| 00029    | N(CH <sub>3</sub> ) <sub>3</sub> | (CH(CH <sub>3</sub> )) <sub>3</sub> | SO <sub>3</sub>    | C[N+](C)(C)C(C)C(C)C(C)S(=O)(=O)[O-]         |
| 00030    | N(CH <sub>3</sub> ) <sub>3</sub> | (CH(CH <sub>3</sub> )) <sub>4</sub> | SO <sub>3</sub>    | C[N+](C)(C)C(C)C(C)C(C)C(C)S(=O)(=O)[O-]     |
| 00031    | N(CH <sub>3</sub> ) <sub>3</sub> | (CH(CH <sub>3</sub> )) <sub>5</sub> | SO <sub>3</sub>    | C[N+](C)(C)C(C)C(C)C(C)C(C)C(C)S(=O)(=O)[O-] |
| 00032    | N(CH <sub>3</sub> ) <sub>3</sub> |                                     | OPO <sub>3</sub> H | C[N+](C)(C)OP(=O)(O)[O-]                     |
| 00033    | N(CH <sub>3</sub> ) <sub>3</sub> | CH <sub>2</sub>                     | OPO <sub>3</sub> H | C[N+](C)(C)COP(=O)(O)[O-]                    |
| 00034    | N(CH <sub>3</sub> ) <sub>3</sub> | (CH <sub>2</sub> ) <sub>2</sub>     | OPO <sub>3</sub> H | C[N+](C)(C)CCOP(=O)(O)[O-]                   |
| 00035    | N(CH <sub>3</sub> ) <sub>3</sub> | (CH <sub>2</sub> ) <sub>3</sub>     | OPO <sub>3</sub> H | C[N+](C)(C)CCCOP(=O)(O)[O-]                  |
| 00036    | N(CH <sub>3</sub> ) <sub>3</sub> | (CH <sub>2</sub> ) <sub>4</sub>     | OPO <sub>3</sub> H | C[N+](C)(C)CCCCOP(=O)(O)[O-]                 |
| 00037    | N(CH <sub>3</sub> ) <sub>3</sub> | (CH <sub>2</sub> ) <sub>5</sub>     | OPO <sub>3</sub> H | C[N+](C)(C)CCCCCOP(=O)(O)[O-]                |

|       |                                   |                                     |                    |                                              |
|-------|-----------------------------------|-------------------------------------|--------------------|----------------------------------------------|
| 00038 | N(CH <sub>3</sub> ) <sub>3</sub>  | CH(OH)                              | OPO <sub>3</sub> H | C[N+](C)(C)C(O)OP(=O)(O)[O-]                 |
| 00039 | N(CH <sub>3</sub> ) <sub>3</sub>  | (CH(OH)) <sub>2</sub>               | OPO <sub>3</sub> H | C[N+](C)(C)C(O)C(O)OP(=O)(O)[O-]             |
| 00040 | N(CH <sub>3</sub> ) <sub>3</sub>  | (CH(OH)) <sub>3</sub>               | OPO <sub>3</sub> H | C[N+](C)(C)C(O)C(O)C(O)OP(=O)(O)[O-]         |
| 00041 | N(CH <sub>3</sub> ) <sub>3</sub>  | (CH(OH)) <sub>4</sub>               | OPO <sub>3</sub> H | C[N+](C)(C)C(O)C(O)C(O)C(O)OP(=O)(O)[O-]     |
| 00042 | N(CH <sub>3</sub> ) <sub>3</sub>  | (CH(OH)) <sub>5</sub>               | OPO <sub>3</sub> H | C[N+](C)(C)C(O)C(O)C(O)C(O)C(O)OP(=O)(O)[O-] |
| 00043 | N(CH <sub>3</sub> ) <sub>3</sub>  | CH(CH <sub>3</sub> )                | OPO <sub>3</sub> H | C[N+](C)(C)C(C)OP(=O)(O)[O-]                 |
| 00044 | N(CH <sub>3</sub> ) <sub>3</sub>  | (CH(CH <sub>3</sub> )) <sub>2</sub> | OPO <sub>3</sub> H | C[N+](C)(C)C(C)C(C)OP(=O)(O)[O-]             |
| 00045 | N(CH <sub>3</sub> ) <sub>3</sub>  | (CH(CH <sub>3</sub> )) <sub>3</sub> | OPO <sub>3</sub> H | C[N+](C)(C)C(C)C(C)C(C)OP(=O)(O)[O-]         |
| 00046 | N(CH <sub>3</sub> ) <sub>3</sub>  | (CH(CH <sub>3</sub> )) <sub>4</sub> | OPO <sub>3</sub> H | C[N+](C)(C)C(C)C(C)C(C)C(C)OP(=O)(O)[O-]     |
| 00047 | N(CH <sub>3</sub> ) <sub>3</sub>  | (CH(CH <sub>3</sub> )) <sub>5</sub> | OPO <sub>3</sub> H | C[N+](C)(C)C(C)C(C)C(C)C(C)C(C)OP(=O)(O)[O-] |
| 00048 | NH(CH <sub>3</sub> ) <sub>2</sub> |                                     | CO <sub>2</sub>    | C[NH+](C)C(=O)[O-]                           |
| 00049 | NH(CH <sub>3</sub> ) <sub>2</sub> | CH <sub>2</sub>                     | CO <sub>2</sub>    | C[NH+](C)CC(=O)[O-]                          |
| 00050 | NH(CH <sub>3</sub> ) <sub>2</sub> | (CH <sub>2</sub> ) <sub>2</sub>     | CO <sub>2</sub>    | C[NH+](C)CCC(=O)[O-]                         |
| 00051 | NH(CH <sub>3</sub> ) <sub>2</sub> | (CH <sub>2</sub> ) <sub>3</sub>     | CO <sub>2</sub>    | C[NH+](C)CCCC(=O)[O-]                        |
| 00052 | NH(CH <sub>3</sub> ) <sub>2</sub> | (CH <sub>2</sub> ) <sub>4</sub>     | CO <sub>2</sub>    | C[NH+](C)CCCCC(=O)[O-]                       |
| 00053 | NH(CH <sub>3</sub> ) <sub>2</sub> | (CH <sub>2</sub> ) <sub>5</sub>     | CO <sub>2</sub>    | C[NH+](C)CCCCCC(=O)[O-]                      |
| 00054 | NH(CH <sub>3</sub> ) <sub>2</sub> | CH(OH)                              | CO <sub>2</sub>    | C[NH+](C)C(O)C(=O)[O-]                       |
| 00055 | NH(CH <sub>3</sub> ) <sub>2</sub> | (CH(OH)) <sub>2</sub>               | CO <sub>2</sub>    | C[NH+](C)C(O)C(O)C(=O)[O-]                   |
| 00056 | NH(CH <sub>3</sub> ) <sub>2</sub> | (CH(OH)) <sub>3</sub>               | CO <sub>2</sub>    | C[NH+](C)C(O)C(O)C(O)C(=O)[O-]               |
| 00057 | NH(CH <sub>3</sub> ) <sub>2</sub> | (CH(OH)) <sub>4</sub>               | CO <sub>2</sub>    | C[NH+](C)C(O)C(O)C(O)C(O)C(=O)[O-]           |
| 00058 | NH(CH <sub>3</sub> ) <sub>2</sub> | (CH(OH)) <sub>5</sub>               | CO <sub>2</sub>    | C[NH+](C)C(O)C(O)C(O)C(O)C(O)C(=O)[O-]       |
| 00059 | NH(CH <sub>3</sub> ) <sub>2</sub> | CH(CH <sub>3</sub> )                | CO <sub>2</sub>    | C[NH+](C)C(C)C(=O)[O-]                       |
| 00060 | NH(CH <sub>3</sub> ) <sub>2</sub> | (CH(CH <sub>3</sub> )) <sub>2</sub> | CO <sub>2</sub>    | C[NH+](C)C(C)C(C)C(=O)[O-]                   |
| 00061 | NH(CH <sub>3</sub> ) <sub>2</sub> | (CH(CH <sub>3</sub> )) <sub>3</sub> | CO <sub>2</sub>    | C[NH+](C)C(C)C(C)C(C)C(=O)[O-]               |
| 00062 | NH(CH <sub>3</sub> ) <sub>2</sub> | (CH(CH <sub>3</sub> )) <sub>4</sub> | CO <sub>2</sub>    | C[NH+](C)C(C)C(C)C(C)C(C)C(=O)[O-]           |
| 00063 | NH(CH <sub>3</sub> ) <sub>2</sub> | (CH(CH <sub>3</sub> )) <sub>5</sub> | CO <sub>2</sub>    | C[NH+](C)C(C)C(C)C(C)C(C)C(C)C(=O)[O-]       |
| 00064 | NH(CH <sub>3</sub> ) <sub>2</sub> |                                     | SO <sub>3</sub>    | C[NH+](C)S(=O)(=O)[O-]                       |
| 00065 | NH(CH <sub>3</sub> ) <sub>2</sub> | CH <sub>2</sub>                     | SO <sub>3</sub>    | C[NH+](C)CS(=O)(=O)[O-]                      |
| 00066 | NH(CH <sub>3</sub> ) <sub>2</sub> | (CH <sub>2</sub> ) <sub>2</sub>     | SO <sub>3</sub>    | C[NH+](C)CCS(=O)(=O)[O-]                     |
| 00067 | NH(CH <sub>3</sub> ) <sub>2</sub> | (CH <sub>2</sub> ) <sub>3</sub>     | SO <sub>3</sub>    | C[NH+](C)CCCS(=O)(=O)[O-]                    |
| 00068 | NH(CH <sub>3</sub> ) <sub>2</sub> | (CH <sub>2</sub> ) <sub>4</sub>     | SO <sub>3</sub>    | C[NH+](C)CCCCS(=O)(=O)[O-]                   |
| 00069 | NH(CH <sub>3</sub> ) <sub>2</sub> | (CH <sub>2</sub> ) <sub>5</sub>     | SO <sub>3</sub>    | C[NH+](C)CCCCCS(=O)(=O)[O-]                  |
| 00070 | NH(CH <sub>3</sub> ) <sub>2</sub> | CH(OH)                              | SO <sub>3</sub>    | C[NH+](C)C(O)S(=O)(=O)[O-]                   |
| 00071 | NH(CH <sub>3</sub> ) <sub>2</sub> | (CH(OH)) <sub>2</sub>               | SO <sub>3</sub>    | C[NH+](C)C(O)C(O)S(=O)(=O)[O-]               |
| 00072 | NH(CH <sub>3</sub> ) <sub>2</sub> | (CH(OH)) <sub>3</sub>               | SO <sub>3</sub>    | C[NH+](C)C(O)C(O)C(O)S(=O)(=O)[O-]           |
| 00073 | NH(CH <sub>3</sub> ) <sub>2</sub> | (CH(OH)) <sub>4</sub>               | SO <sub>3</sub>    | C[NH+](C)C(O)C(O)C(O)C(O)S(=O)(=O)[O-]       |
| 00074 | NH(CH <sub>3</sub> ) <sub>2</sub> | (CH(OH)) <sub>5</sub>               | SO <sub>3</sub>    | C[NH+](C)C(O)C(O)C(O)C(O)C(O)S(=O)(=O)[O-]   |
| 00075 | NH(CH <sub>3</sub> ) <sub>2</sub> | CH(CH <sub>3</sub> )                | SO <sub>3</sub>    | C[NH+](C)C(C)S(=O)(=O)[O-]                   |
| 00076 | NH(CH <sub>3</sub> ) <sub>2</sub> | (CH(CH <sub>3</sub> )) <sub>2</sub> | SO <sub>3</sub>    | C[NH+](C)C(C)C(C)S(=O)(=O)[O-]               |
| 00077 | NH(CH <sub>3</sub> ) <sub>2</sub> | (CH(CH <sub>3</sub> )) <sub>3</sub> | SO <sub>3</sub>    | C[NH+](C)C(C)C(C)C(C)S(=O)(=O)[O-]           |
| 00078 | NH(CH <sub>3</sub> ) <sub>2</sub> | (CH(CH <sub>3</sub> )) <sub>4</sub> | SO <sub>3</sub>    | C[NH+](C)C(C)C(C)C(C)C(C)S(=O)(=O)[O-]       |

|       |                                    |                                     |                    |                                            |
|-------|------------------------------------|-------------------------------------|--------------------|--------------------------------------------|
| 00079 | NH(CH <sub>3</sub> ) <sub>2</sub>  | (CH(CH <sub>3</sub> )) <sub>5</sub> | SO <sub>3</sub>    | C[NH+](C)C(C)C(C)C(C)C(C)C(C)S(=O)(=O)[O-] |
| 00080 | NH(CH <sub>3</sub> ) <sub>2</sub>  |                                     | OPO <sub>3</sub> H | C[NH+](C)OP(=O)(O)[O-]                     |
| 00081 | NH(CH <sub>3</sub> ) <sub>2</sub>  | CH <sub>2</sub>                     | OPO <sub>3</sub> H | C[NH+](C)COP(=O)(O)[O-]                    |
| 00082 | NH(CH <sub>3</sub> ) <sub>2</sub>  | (CH <sub>2</sub> ) <sub>2</sub>     | OPO <sub>3</sub> H | C[NH+](C)CCOP(=O)(O)[O-]                   |
| 00083 | NH(CH <sub>3</sub> ) <sub>2</sub>  | (CH <sub>2</sub> ) <sub>3</sub>     | OPO <sub>3</sub> H | C[NH+](C)CCCOP(=O)(O)[O-]                  |
| 00084 | NH(CH <sub>3</sub> ) <sub>2</sub>  | (CH <sub>2</sub> ) <sub>4</sub>     | OPO <sub>3</sub> H | C[NH+](C)CCCCOP(=O)(O)[O-]                 |
| 00085 | NH(CH <sub>3</sub> ) <sub>2</sub>  | (CH <sub>2</sub> ) <sub>5</sub>     | OPO <sub>3</sub> H | C[NH+](C)CCCCCOP(=O)(O)[O-]                |
| 00086 | NH(CH <sub>3</sub> ) <sub>2</sub>  | CH(OH)                              | OPO <sub>3</sub> H | C[NH+](C)C(O)OP(=O)(O)[O-]                 |
| 00087 | NH(CH <sub>3</sub> ) <sub>2</sub>  | (CH(OH)) <sub>2</sub>               | OPO <sub>3</sub> H | C[NH+](C)C(O)C(O)OP(=O)(O)[O-]             |
| 00088 | NH(CH <sub>3</sub> ) <sub>2</sub>  | (CH(OH)) <sub>3</sub>               | OPO <sub>3</sub> H | C[NH+](C)C(O)C(O)C(O)OP(=O)(O)[O-]         |
| 00089 | NH(CH <sub>3</sub> ) <sub>2</sub>  | (CH(OH)) <sub>4</sub>               | OPO <sub>3</sub> H | C[NH+](C)C(O)C(O)C(O)C(O)OP(=O)(O)[O-]     |
| 00090 | NH(CH <sub>3</sub> ) <sub>2</sub>  | (CH(OH)) <sub>5</sub>               | OPO <sub>3</sub> H | C[NH+](C)C(O)C(O)C(O)C(O)C(O)OP(=O)(O)[O-] |
| 00091 | NH(CH <sub>3</sub> ) <sub>2</sub>  | CH(CH <sub>3</sub> )                | OPO <sub>3</sub> H | C[NH+](C)C(C)OP(=O)(O)[O-]                 |
| 00092 | NH(CH <sub>3</sub> ) <sub>2</sub>  | (CH(CH <sub>3</sub> )) <sub>2</sub> | OPO <sub>3</sub> H | C[NH+](C)C(C)C(C)OP(=O)(O)[O-]             |
| 00093 | NH(CH <sub>3</sub> ) <sub>2</sub>  | (CH(CH <sub>3</sub> )) <sub>3</sub> | OPO <sub>3</sub> H | C[NH+](C)C(C)C(C)C(C)OP(=O)(O)[O-]         |
| 00094 | NH(CH <sub>3</sub> ) <sub>2</sub>  | (CH(CH <sub>3</sub> )) <sub>4</sub> | OPO <sub>3</sub> H | C[NH+](C)C(C)C(C)C(C)C(C)OP(=O)(O)[O-]     |
| 00095 | NH(CH <sub>3</sub> ) <sub>2</sub>  | (CH(CH <sub>3</sub> )) <sub>5</sub> | OPO <sub>3</sub> H | C[NH+](C)C(C)C(C)C(C)C(C)C(C)OP(=O)(O)[O-] |
| 00096 | NH <sub>2</sub> (CH <sub>3</sub> ) |                                     | CO <sub>2</sub>    | C[NH2+](C(=O)[O-])                         |
| 00097 | NH <sub>2</sub> (CH <sub>3</sub> ) | CH <sub>2</sub>                     | CO <sub>2</sub>    | C[NH2+](CC(=O)[O-])                        |
| 00098 | NH <sub>2</sub> (CH <sub>3</sub> ) | (CH <sub>2</sub> ) <sub>2</sub>     | CO <sub>2</sub>    | C[NH2+](CCC(=O)[O-])                       |
| 00099 | NH <sub>2</sub> (CH <sub>3</sub> ) | (CH <sub>2</sub> ) <sub>3</sub>     | CO <sub>2</sub>    | C[NH2+](CCCC(=O)[O-])                      |
| 00100 | NH <sub>2</sub> (CH <sub>3</sub> ) | (CH <sub>2</sub> ) <sub>4</sub>     | CO <sub>2</sub>    | C[NH2+](CCCCC(=O)[O-])                     |
| 00101 | NH <sub>2</sub> (CH <sub>3</sub> ) | (CH <sub>2</sub> ) <sub>5</sub>     | CO <sub>2</sub>    | C[NH2+](CCCCCC(=O)[O-])                    |
| 00102 | NH <sub>2</sub> (CH <sub>3</sub> ) | CH(OH)                              | CO <sub>2</sub>    | C[NH2+](C(O)C(=O)[O-])                     |
| 00103 | NH <sub>2</sub> (CH <sub>3</sub> ) | (CH(OH)) <sub>2</sub>               | CO <sub>2</sub>    | C[NH2+](C(O)C(O)C(=O)[O-])                 |
| 00104 | NH <sub>2</sub> (CH <sub>3</sub> ) | (CH(OH)) <sub>3</sub>               | CO <sub>2</sub>    | C[NH2+](C(O)C(O)C(O)C(=O)[O-])             |
| 00105 | NH <sub>2</sub> (CH <sub>3</sub> ) | (CH(OH)) <sub>4</sub>               | CO <sub>2</sub>    | C[NH2+](C(O)C(O)C(O)C(O)C(=O)[O-])         |
| 00106 | NH <sub>2</sub> (CH <sub>3</sub> ) | (CH(OH)) <sub>5</sub>               | CO <sub>2</sub>    | C[NH2+](C(O)C(O)C(O)C(O)C(O)C(=O)[O-])     |
| 00107 | NH <sub>2</sub> (CH <sub>3</sub> ) | CH(CH <sub>3</sub> )                | CO <sub>2</sub>    | C[NH2+](C(C)C(=O)[O-])                     |
| 00108 | NH <sub>2</sub> (CH <sub>3</sub> ) | (CH(CH <sub>3</sub> )) <sub>2</sub> | CO <sub>2</sub>    | C[NH2+](C(C)C(C)C(=O)[O-])                 |
| 00109 | NH <sub>2</sub> (CH <sub>3</sub> ) | (CH(CH <sub>3</sub> )) <sub>3</sub> | CO <sub>2</sub>    | C[NH2+](C(C)C(C)C(C)C(=O)[O-])             |
| 00110 | NH <sub>2</sub> (CH <sub>3</sub> ) | (CH(CH <sub>3</sub> )) <sub>4</sub> | CO <sub>2</sub>    | C[NH2+](C(C)C(C)C(C)C(C)C(=O)[O-])         |
| 00111 | NH <sub>2</sub> (CH <sub>3</sub> ) | (CH(CH <sub>3</sub> )) <sub>5</sub> | CO <sub>2</sub>    | C[NH2+](C(C)C(C)C(C)C(C)C(C)C(=O)[O-])     |
| 00112 | NH <sub>2</sub> (CH <sub>3</sub> ) |                                     | SO <sub>3</sub>    | C[NH2+](S(=O)(=O)[O-])                     |
| 00113 | NH <sub>2</sub> (CH <sub>3</sub> ) | CH <sub>2</sub>                     | SO <sub>3</sub>    | C[NH2+](CS(=O)(=O)[O-])                    |
| 00114 | NH <sub>2</sub> (CH <sub>3</sub> ) | (CH <sub>2</sub> ) <sub>2</sub>     | SO <sub>3</sub>    | C[NH2+](CCS(=O)(=O)[O-])                   |
| 00115 | NH <sub>2</sub> (CH <sub>3</sub> ) | (CH <sub>2</sub> ) <sub>3</sub>     | SO <sub>3</sub>    | C[NH2+](CCCS(=O)(=O)[O-])                  |
| 00116 | NH <sub>2</sub> (CH <sub>3</sub> ) | (CH <sub>2</sub> ) <sub>4</sub>     | SO <sub>3</sub>    | C[NH2+](CCCCS(=O)(=O)[O-])                 |
| 00117 | NH <sub>2</sub> (CH <sub>3</sub> ) | (CH <sub>2</sub> ) <sub>5</sub>     | SO <sub>3</sub>    | C[NH2+](CCCCCS(=O)(=O)[O-])                |
| 00118 | NH <sub>2</sub> (CH <sub>3</sub> ) | CH(OH)                              | SO <sub>3</sub>    | C[NH2+](C(O)S(=O)(=O)[O-])                 |
| 00119 | NH <sub>2</sub> (CH <sub>3</sub> ) | (CH(OH)) <sub>2</sub>               | SO <sub>3</sub>    | C[NH2+](C(O)C(O)S(=O)(=O)[O-])             |

|        |                                    |                                     |                    |                                                       |
|--------|------------------------------------|-------------------------------------|--------------------|-------------------------------------------------------|
| 00120  | NH <sub>2</sub> (CH <sub>3</sub> ) | (CH(OH)) <sub>3</sub>               | SO <sub>3</sub>    | C[NH <sub>2</sub> +]C(O)C(O)C(O)S(=O)(=O)[O-]         |
| 00121  | NH <sub>2</sub> (CH <sub>3</sub> ) | (CH(OH)) <sub>4</sub>               | SO <sub>3</sub>    | C[NH <sub>2</sub> +]C(O)C(O)C(O)C(O)S(=O)(=O)[O-]     |
| 00122  | NH <sub>2</sub> (CH <sub>3</sub> ) | (CH(OH)) <sub>5</sub>               | SO <sub>3</sub>    | C[NH <sub>2</sub> +]C(O)C(O)C(O)C(O)C(O)S(=O)(=O)[O-] |
| 00123  | NH <sub>2</sub> (CH <sub>3</sub> ) | CH(CH <sub>3</sub> )                | SO <sub>3</sub>    | C[NH <sub>2</sub> +]C(C)S(=O)(=O)[O-]                 |
| 00124  | NH <sub>2</sub> (CH <sub>3</sub> ) | (CH(CH <sub>3</sub> )) <sub>2</sub> | SO <sub>3</sub>    | C[NH <sub>2</sub> +]C(C)C(C)S(=O)(=O)[O-]             |
| 00125  | NH <sub>2</sub> (CH <sub>3</sub> ) | (CH(CH <sub>3</sub> )) <sub>3</sub> | SO <sub>3</sub>    | C[NH <sub>2</sub> +]C(C)C(C)C(C)S(=O)(=O)[O-]         |
| 00126  | NH <sub>2</sub> (CH <sub>3</sub> ) | (CH(CH <sub>3</sub> )) <sub>4</sub> | SO <sub>3</sub>    | C[NH <sub>2</sub> +]C(C)C(C)C(C)C(C)S(=O)(=O)[O-]     |
| 00127  | NH <sub>2</sub> (CH <sub>3</sub> ) | (CH(CH <sub>3</sub> )) <sub>5</sub> | SO <sub>3</sub>    | C[NH <sub>2</sub> +]C(C)C(C)C(C)C(C)C(C)S(=O)(=O)[O-] |
| *00128 | NH <sub>2</sub> (CH <sub>3</sub> ) |                                     | OPO <sub>3</sub> H | C[NH <sub>2</sub> +]OP(=O)(O)[O-]                     |
| 00129  | NH <sub>2</sub> (CH <sub>3</sub> ) | CH <sub>2</sub>                     | OPO <sub>3</sub> H | C[NH <sub>2</sub> +]COP(=O)(O)[O-]                    |
| 00130  | NH <sub>2</sub> (CH <sub>3</sub> ) | (CH <sub>2</sub> ) <sub>2</sub>     | OPO <sub>3</sub> H | C[NH <sub>2</sub> +]CCOP(=O)(O)[O-]                   |
| 00131  | NH <sub>2</sub> (CH <sub>3</sub> ) | (CH <sub>2</sub> ) <sub>3</sub>     | OPO <sub>3</sub> H | C[NH <sub>2</sub> +]CCCCOP(=O)(O)[O-]                 |
| 00132  | NH <sub>2</sub> (CH <sub>3</sub> ) | (CH <sub>2</sub> ) <sub>4</sub>     | OPO <sub>3</sub> H | C[NH <sub>2</sub> +]CCCCCOP(=O)(O)[O-]                |
| 00133  | NH <sub>2</sub> (CH <sub>3</sub> ) | (CH <sub>2</sub> ) <sub>5</sub>     | OPO <sub>3</sub> H | C[NH <sub>2</sub> +]CCCCCOP(=O)(O)[O-]                |
| 00134  | NH <sub>2</sub> (CH <sub>3</sub> ) | CH(OH)                              | OPO <sub>3</sub> H | C[NH <sub>2</sub> +]C(O)OP(=O)(O)[O-]                 |
| 00135  | NH <sub>2</sub> (CH <sub>3</sub> ) | (CH(OH)) <sub>2</sub>               | OPO <sub>3</sub> H | C[NH <sub>2</sub> +]C(O)C(O)OP(=O)(O)[O-]             |
| 00136  | NH <sub>2</sub> (CH <sub>3</sub> ) | (CH(OH)) <sub>3</sub>               | OPO <sub>3</sub> H | C[NH <sub>2</sub> +]C(O)C(O)C(O)OP(=O)(O)[O-]         |
| 00137  | NH <sub>2</sub> (CH <sub>3</sub> ) | (CH(OH)) <sub>4</sub>               | OPO <sub>3</sub> H | C[NH <sub>2</sub> +]C(O)C(O)C(O)C(O)OP(=O)(O)[O-]     |
| 00138  | NH <sub>2</sub> (CH <sub>3</sub> ) | (CH(OH)) <sub>5</sub>               | OPO <sub>3</sub> H | C[NH <sub>2</sub> +]C(O)C(O)C(O)C(O)C(O)OP(=O)(O)[O-] |
| 00139  | NH <sub>2</sub> (CH <sub>3</sub> ) | CH(CH <sub>3</sub> )                | OPO <sub>3</sub> H | C[NH <sub>2</sub> +]C(C)OP(=O)(O)[O-]                 |
| 00140  | NH <sub>2</sub> (CH <sub>3</sub> ) | (CH(CH <sub>3</sub> )) <sub>2</sub> | OPO <sub>3</sub> H | C[NH <sub>2</sub> +]C(C)C(C)OP(=O)(O)[O-]             |
| 00141  | NH <sub>2</sub> (CH <sub>3</sub> ) | (CH(CH <sub>3</sub> )) <sub>3</sub> | OPO <sub>3</sub> H | C[NH <sub>2</sub> +]C(C)C(C)C(C)OP(=O)(O)[O-]         |
| 00142  | NH <sub>2</sub> (CH <sub>3</sub> ) | (CH(CH <sub>3</sub> )) <sub>4</sub> | OPO <sub>3</sub> H | C[NH <sub>2</sub> +]C(C)C(C)C(C)C(C)OP(=O)(O)[O-]     |
| 00143  | NH <sub>2</sub> (CH <sub>3</sub> ) | (CH(CH <sub>3</sub> )) <sub>5</sub> | OPO <sub>3</sub> H | C[NH <sub>2</sub> +]C(C)C(C)C(C)C(C)C(C)OP(=O)(O)[O-] |
| 00144  | NH <sub>3</sub>                    |                                     | CO <sub>2</sub>    | [NH <sub>3</sub> +]C(=O)[O-]                          |
| 00145  | NH <sub>3</sub>                    | CH <sub>2</sub>                     | CO <sub>2</sub>    | [NH <sub>3</sub> +]CC(=O)[O-]                         |
| 00146  | NH <sub>3</sub>                    | (CH <sub>2</sub> ) <sub>2</sub>     | CO <sub>2</sub>    | [NH <sub>3</sub> +]CCC(=O)[O-]                        |
| 00147  | NH <sub>3</sub>                    | (CH <sub>2</sub> ) <sub>3</sub>     | CO <sub>2</sub>    | [NH <sub>3</sub> +]CCCC(=O)[O-]                       |
| 00148  | NH <sub>3</sub>                    | (CH <sub>2</sub> ) <sub>4</sub>     | CO <sub>2</sub>    | [NH <sub>3</sub> +]CCCCC(=O)[O-]                      |
| 00149  | NH <sub>3</sub>                    | (CH <sub>2</sub> ) <sub>5</sub>     | CO <sub>2</sub>    | [NH <sub>3</sub> +]CCCCC(=O)[O-]                      |
| 00150  | NH <sub>3</sub>                    | CH(OH)                              | CO <sub>2</sub>    | [NH <sub>3</sub> +]C(O)C(=O)[O-]                      |
| 00151  | NH <sub>3</sub>                    | (CH(OH)) <sub>2</sub>               | CO <sub>2</sub>    | [NH <sub>3</sub> +]C(O)C(O)C(=O)[O-]                  |
| 00152  | NH <sub>3</sub>                    | (CH(OH)) <sub>3</sub>               | CO <sub>2</sub>    | [NH <sub>3</sub> +]C(O)C(O)C(O)C(=O)[O-]              |
| 00153  | NH <sub>3</sub>                    | (CH(OH)) <sub>4</sub>               | CO <sub>2</sub>    | [NH <sub>3</sub> +]C(O)C(O)C(O)C(O)C(=O)[O-]          |
| 00154  | NH <sub>3</sub>                    | (CH(OH)) <sub>5</sub>               | CO <sub>2</sub>    | [NH <sub>3</sub> +]C(O)C(O)C(O)C(O)C(O)C(=O)[O-]      |
| 00155  | NH <sub>3</sub>                    | CH(CH <sub>3</sub> )                | CO <sub>2</sub>    | [NH <sub>3</sub> +]C(C)C(=O)[O-]                      |
| 00156  | NH <sub>3</sub>                    | (CH(CH <sub>3</sub> )) <sub>2</sub> | CO <sub>2</sub>    | [NH <sub>3</sub> +]C(C)C(C)C(=O)[O-]                  |
| 00157  | NH <sub>3</sub>                    | (CH(CH <sub>3</sub> )) <sub>3</sub> | CO <sub>2</sub>    | [NH <sub>3</sub> +]C(C)C(C)C(C)C(=O)[O-]              |
| 00158  | NH <sub>3</sub>                    | (CH(CH <sub>3</sub> )) <sub>4</sub> | CO <sub>2</sub>    | [NH <sub>3</sub> +]C(C)C(C)C(C)C(C)C(=O)[O-]          |
| 00159  | NH <sub>3</sub>                    | (CH(CH <sub>3</sub> )) <sub>5</sub> | CO <sub>2</sub>    | [NH <sub>3</sub> +]C(C)C(C)C(C)C(C)C(C)C(=O)[O-]      |
| *00160 | NH <sub>3</sub>                    |                                     | SO <sub>3</sub>    | [NH <sub>3</sub> +]S(=O)(=O)[O-]                      |

|       |                                  |                                     |                    |                                         |
|-------|----------------------------------|-------------------------------------|--------------------|-----------------------------------------|
| 00161 | NH <sub>3</sub>                  | CH <sub>2</sub>                     | SO <sub>3</sub>    | [NH3+]CS(=O)(=O)[O-]                    |
| 00162 | NH <sub>3</sub>                  | (CH <sub>2</sub> ) <sub>2</sub>     | SO <sub>3</sub>    | [NH3+]CCS(=O)(=O)[O-]                   |
| 00163 | NH <sub>3</sub>                  | (CH <sub>2</sub> ) <sub>3</sub>     | SO <sub>3</sub>    | [NH3+]CCCS(=O)(=O)[O-]                  |
| 00164 | NH <sub>3</sub>                  | (CH <sub>2</sub> ) <sub>4</sub>     | SO <sub>3</sub>    | [NH3+]CCCCS(=O)(=O)[O-]                 |
| 00165 | NH <sub>3</sub>                  | (CH <sub>2</sub> ) <sub>5</sub>     | SO <sub>3</sub>    | [NH3+]CCCCCS(=O)(=O)[O-]                |
| 00166 | NH <sub>3</sub>                  | CH(OH)                              | SO <sub>3</sub>    | [NH3+]C(O)S(=O)(=O)[O-]                 |
| 00167 | NH <sub>3</sub>                  | (CH(OH)) <sub>2</sub>               | SO <sub>3</sub>    | [NH3+]C(O)C(O)S(=O)(=O)[O-]             |
| 00168 | NH <sub>3</sub>                  | (CH(OH)) <sub>3</sub>               | SO <sub>3</sub>    | [NH3+]C(O)C(O)C(O)S(=O)(=O)[O-]         |
| 00169 | NH <sub>3</sub>                  | (CH(OH)) <sub>4</sub>               | SO <sub>3</sub>    | [NH3+]C(O)C(O)C(O)C(O)S(=O)(=O)[O-]     |
| 00170 | NH <sub>3</sub>                  | (CH(OH)) <sub>5</sub>               | SO <sub>3</sub>    | [NH3+]C(O)C(O)C(O)C(O)C(O)S(=O)(=O)[O-] |
| 00171 | NH <sub>3</sub>                  | CH(CH <sub>3</sub> )                | SO <sub>3</sub>    | [NH3+]C(C)S(=O)(=O)[O-]                 |
| 00172 | NH <sub>3</sub>                  | (CH(CH <sub>3</sub> )) <sub>2</sub> | SO <sub>3</sub>    | [NH3+]C(C)C(C)S(=O)(=O)[O-]             |
| 00173 | NH <sub>3</sub>                  | (CH(CH <sub>3</sub> )) <sub>3</sub> | SO <sub>3</sub>    | [NH3+]C(C)C(C)C(C)S(=O)(=O)[O-]         |
| 00174 | NH <sub>3</sub>                  | (CH(CH <sub>3</sub> )) <sub>4</sub> | SO <sub>3</sub>    | [NH3+]C(C)C(C)C(C)C(C)S(=O)(=O)[O-]     |
| 00175 | NH <sub>3</sub>                  | (CH(CH <sub>3</sub> )) <sub>5</sub> | SO <sub>3</sub>    | [NH3+]C(C)C(C)C(C)C(C)C(C)S(=O)(=O)[O-] |
| 00176 | NH <sub>3</sub>                  |                                     | OPO <sub>3</sub> H | [NH3+]OP(=O)(O)[O-]                     |
| 00177 | NH <sub>3</sub>                  | CH <sub>2</sub>                     | OPO <sub>3</sub> H | [NH3+]COP(=O)(O)[O-]                    |
| 00178 | NH <sub>3</sub>                  | (CH <sub>2</sub> ) <sub>2</sub>     | OPO <sub>3</sub> H | [NH3+]CCOP(=O)(O)[O-]                   |
| 00179 | NH <sub>3</sub>                  | (CH <sub>2</sub> ) <sub>3</sub>     | OPO <sub>3</sub> H | [NH3+]CCCCOP(=O)(O)[O-]                 |
| 00180 | NH <sub>3</sub>                  | (CH <sub>2</sub> ) <sub>4</sub>     | OPO <sub>3</sub> H | [NH3+]CCCCCOP(=O)(O)[O-]                |
| 00181 | NH <sub>3</sub>                  | (CH <sub>2</sub> ) <sub>5</sub>     | OPO <sub>3</sub> H | [NH3+]CCCCCOP(=O)(O)[O-]                |
| 00182 | NH <sub>3</sub>                  | CH(OH)                              | OPO <sub>3</sub> H | [NH3+]C(O)OP(=O)(O)[O-]                 |
| 00183 | NH <sub>3</sub>                  | (CH(OH)) <sub>2</sub>               | OPO <sub>3</sub> H | [NH3+]C(O)C(O)OP(=O)(O)[O-]             |
| 00184 | NH <sub>3</sub>                  | (CH(OH)) <sub>3</sub>               | OPO <sub>3</sub> H | [NH3+]C(O)C(O)C(O)OP(=O)(O)[O-]         |
| 00185 | NH <sub>3</sub>                  | (CH(OH)) <sub>4</sub>               | OPO <sub>3</sub> H | [NH3+]C(O)C(O)C(O)C(O)OP(=O)(O)[O-]     |
| 00186 | NH <sub>3</sub>                  | (CH(OH)) <sub>5</sub>               | OPO <sub>3</sub> H | [NH3+]C(O)C(O)C(O)C(O)C(O)OP(=O)(O)[O-] |
| 00187 | NH <sub>3</sub>                  | CH(CH <sub>3</sub> )                | OPO <sub>3</sub> H | [NH3+]C(C)OP(=O)(O)[O-]                 |
| 00188 | NH <sub>3</sub>                  | (CH(CH <sub>3</sub> )) <sub>2</sub> | OPO <sub>3</sub> H | [NH3+]C(C)C(C)OP(=O)(O)[O-]             |
| 00189 | NH <sub>3</sub>                  | (CH(CH <sub>3</sub> )) <sub>3</sub> | OPO <sub>3</sub> H | [NH3+]C(C)C(C)C(C)OP(=O)(O)[O-]         |
| 00190 | NH <sub>3</sub>                  | (CH(CH <sub>3</sub> )) <sub>4</sub> | OPO <sub>3</sub> H | [NH3+]C(C)C(C)C(C)C(C)OP(=O)(O)[O-]     |
| 00191 | NH <sub>3</sub>                  | (CH(CH <sub>3</sub> )) <sub>5</sub> | OPO <sub>3</sub> H | [NH3+]C(C)C(C)C(C)C(C)C(C)OP(=O)(O)[O-] |
| 00192 | S(CH <sub>3</sub> ) <sub>2</sub> |                                     | CO <sub>2</sub>    | C[S+](C)C(=O)[O-]                       |
| 00193 | S(CH <sub>3</sub> ) <sub>2</sub> | CH <sub>2</sub>                     | CO <sub>2</sub>    | C[S+](C)CC(=O)[O-]                      |
| 00194 | S(CH <sub>3</sub> ) <sub>2</sub> | (CH <sub>2</sub> ) <sub>2</sub>     | CO <sub>2</sub>    | C[S+](C)CCC(=O)[O-]                     |
| 00195 | S(CH <sub>3</sub> ) <sub>2</sub> | (CH <sub>2</sub> ) <sub>3</sub>     | CO <sub>2</sub>    | C[S+](C)CCCC(=O)[O-]                    |
| 00196 | S(CH <sub>3</sub> ) <sub>2</sub> | (CH <sub>2</sub> ) <sub>4</sub>     | CO <sub>2</sub>    | C[S+](C)CCCCC(=O)[O-]                   |
| 00197 | S(CH <sub>3</sub> ) <sub>2</sub> | (CH <sub>2</sub> ) <sub>5</sub>     | CO <sub>2</sub>    | C[S+](C)CCCCC(=O)[O-]                   |
| 00198 | S(CH <sub>3</sub> ) <sub>2</sub> | CH(OH)                              | CO <sub>2</sub>    | C[S+](C)C(O)C(=O)[O-]                   |
| 00199 | S(CH <sub>3</sub> ) <sub>2</sub> | (CH(OH)) <sub>2</sub>               | CO <sub>2</sub>    | C[S+](C)C(O)C(O)C(=O)[O-]               |
| 00200 | S(CH <sub>3</sub> ) <sub>2</sub> | (CH(OH)) <sub>3</sub>               | CO <sub>2</sub>    | C[S+](C)C(O)C(O)C(O)C(=O)[O-]           |
| 00201 | S(CH <sub>3</sub> ) <sub>2</sub> | (CH(OH)) <sub>4</sub>               | CO <sub>2</sub>    | C[S+](C)C(O)C(O)C(O)C(O)C(=O)[O-]       |



|       |                                  |                                     |                    |                                           |
|-------|----------------------------------|-------------------------------------|--------------------|-------------------------------------------|
| 00202 | S(CH <sub>3</sub> ) <sub>2</sub> | (CH(OH)) <sub>5</sub>               | CO <sub>2</sub>    | C[S+](C)C(O)C(O)C(O)C(O)C(O)C(O)C(=O)[O-] |
| 00203 | S(CH <sub>3</sub> ) <sub>2</sub> | CH(CH <sub>3</sub> )                | CO <sub>2</sub>    | C[S+](C)C(C)C(=O)[O-]                     |
| 00204 | S(CH <sub>3</sub> ) <sub>2</sub> | (CH(CH <sub>3</sub> )) <sub>2</sub> | CO <sub>2</sub>    | C[S+](C)C(C)C(C)C(=O)[O-]                 |
| 00205 | S(CH <sub>3</sub> ) <sub>2</sub> | (CH(CH <sub>3</sub> )) <sub>3</sub> | CO <sub>2</sub>    | C[S+](C)C(C)C(C)C(C)C(=O)[O-]             |
| 00206 | S(CH <sub>3</sub> ) <sub>2</sub> | (CH(CH <sub>3</sub> )) <sub>4</sub> | CO <sub>2</sub>    | C[S+](C)C(C)C(C)C(C)C(C)C(=O)[O-]         |
| 00207 | S(CH <sub>3</sub> ) <sub>2</sub> | (CH(CH <sub>3</sub> )) <sub>5</sub> | CO <sub>2</sub>    | C[S+](C)C(C)C(C)C(C)C(C)C(C)C(=O)[O-]     |
| 00208 | S(CH <sub>3</sub> ) <sub>2</sub> |                                     | SO <sub>3</sub>    | C[S+](C)S(=O)(=O)[O-]                     |
| 00209 | S(CH <sub>3</sub> ) <sub>2</sub> | CH <sub>2</sub>                     | SO <sub>3</sub>    | C[S+](C)CS(=O)(=O)[O-]                    |
| 00210 | S(CH <sub>3</sub> ) <sub>2</sub> | (CH <sub>2</sub> ) <sub>2</sub>     | SO <sub>3</sub>    | C[S+](C)CCS(=O)(=O)[O-]                   |
| 00211 | S(CH <sub>3</sub> ) <sub>2</sub> | (CH <sub>2</sub> ) <sub>3</sub>     | SO <sub>3</sub>    | C[S+](C)CCCS(=O)(=O)[O-]                  |
| 00212 | S(CH <sub>3</sub> ) <sub>2</sub> | (CH <sub>2</sub> ) <sub>4</sub>     | SO <sub>3</sub>    | C[S+](C)CCCCS(=O)(=O)[O-]                 |
| 00213 | S(CH <sub>3</sub> ) <sub>2</sub> | (CH <sub>2</sub> ) <sub>5</sub>     | SO <sub>3</sub>    | C[S+](C)CCCCCS(=O)(=O)[O-]                |
| 00214 | S(CH <sub>3</sub> ) <sub>2</sub> | CH(OH)                              | SO <sub>3</sub>    | C[S+](C)C(O)S(=O)(=O)[O-]                 |
| 00215 | S(CH <sub>3</sub> ) <sub>2</sub> | (CH(OH)) <sub>2</sub>               | SO <sub>3</sub>    | C[S+](C)C(O)C(O)S(=O)(=O)[O-]             |
| 00216 | S(CH <sub>3</sub> ) <sub>2</sub> | (CH(OH)) <sub>3</sub>               | SO <sub>3</sub>    | C[S+](C)C(O)C(O)C(O)S(=O)(=O)[O-]         |
| 00217 | S(CH <sub>3</sub> ) <sub>2</sub> | (CH(OH)) <sub>4</sub>               | SO <sub>3</sub>    | C[S+](C)C(O)C(O)C(O)C(O)S(=O)(=O)[O-]     |
| 00218 | S(CH <sub>3</sub> ) <sub>2</sub> | (CH(OH)) <sub>5</sub>               | SO <sub>3</sub>    | C[S+](C)C(O)C(O)C(O)C(O)C(O)S(=O)(=O)[O-] |
| 00219 | S(CH <sub>3</sub> ) <sub>2</sub> | CH(CH <sub>3</sub> )                | SO <sub>3</sub>    | C[S+](C)C(C)S(=O)(=O)[O-]                 |
| 00220 | S(CH <sub>3</sub> ) <sub>2</sub> | (CH(CH <sub>3</sub> )) <sub>2</sub> | SO <sub>3</sub>    | C[S+](C)C(C)C(C)S(=O)(=O)[O-]             |
| 00221 | S(CH <sub>3</sub> ) <sub>2</sub> | (CH(CH <sub>3</sub> )) <sub>3</sub> | SO <sub>3</sub>    | C[S+](C)C(C)C(C)C(C)S(=O)(=O)[O-]         |
| 00222 | S(CH <sub>3</sub> ) <sub>2</sub> | (CH(CH <sub>3</sub> )) <sub>4</sub> | SO <sub>3</sub>    | C[S+](C)C(C)C(C)C(C)C(C)S(=O)(=O)[O-]     |
| 00223 | S(CH <sub>3</sub> ) <sub>2</sub> | (CH(CH <sub>3</sub> )) <sub>5</sub> | SO <sub>3</sub>    | C[S+](C)C(C)C(C)C(C)C(C)C(C)S(=O)(=O)[O-] |
| 00224 | S(CH <sub>3</sub> ) <sub>2</sub> |                                     | OPO <sub>3</sub> H | C[S+](C)OP(=O)(O)[O-]                     |
| 00225 | S(CH <sub>3</sub> ) <sub>2</sub> | CH <sub>2</sub>                     | OPO <sub>3</sub> H | C[S+](C)COP(=O)(O)[O-]                    |
| 00226 | S(CH <sub>3</sub> ) <sub>2</sub> | (CH <sub>2</sub> ) <sub>2</sub>     | OPO <sub>3</sub> H | C[S+](C)CCOP(=O)(O)[O-]                   |
| 00227 | S(CH <sub>3</sub> ) <sub>2</sub> | (CH <sub>2</sub> ) <sub>3</sub>     | OPO <sub>3</sub> H | C[S+](C)CCCOP(=O)(O)[O-]                  |
| 00228 | S(CH <sub>3</sub> ) <sub>2</sub> | (CH <sub>2</sub> ) <sub>4</sub>     | OPO <sub>3</sub> H | C[S+](C)CCCCOP(=O)(O)[O-]                 |
| 00229 | S(CH <sub>3</sub> ) <sub>2</sub> | (CH <sub>2</sub> ) <sub>5</sub>     | OPO <sub>3</sub> H | C[S+](C)CCCCCOP(=O)(O)[O-]                |
| 00230 | S(CH <sub>3</sub> ) <sub>2</sub> | CH(OH)                              | OPO <sub>3</sub> H | C[S+](C)C(O)OP(=O)(O)[O-]                 |
| 00231 | S(CH <sub>3</sub> ) <sub>2</sub> | (CH(OH)) <sub>2</sub>               | OPO <sub>3</sub> H | C[S+](C)C(O)C(O)OP(=O)(O)[O-]             |
| 00232 | S(CH <sub>3</sub> ) <sub>2</sub> | (CH(OH)) <sub>3</sub>               | OPO <sub>3</sub> H | C[S+](C)C(O)C(O)C(O)OP(=O)(O)[O-]         |
| 00233 | S(CH <sub>3</sub> ) <sub>2</sub> | (CH(OH)) <sub>4</sub>               | OPO <sub>3</sub> H | C[S+](C)C(O)C(O)C(O)C(O)OP(=O)(O)[O-]     |
| 00234 | S(CH <sub>3</sub> ) <sub>2</sub> | (CH(OH)) <sub>5</sub>               | OPO <sub>3</sub> H | C[S+](C)C(O)C(O)C(O)C(O)C(O)OP(=O)(O)[O-] |
| 00235 | S(CH <sub>3</sub> ) <sub>2</sub> | CH(CH <sub>3</sub> )                | OPO <sub>3</sub> H | C[S+](C)C(C)OP(=O)(O)[O-]                 |
| 00236 | S(CH <sub>3</sub> ) <sub>2</sub> | (CH(CH <sub>3</sub> )) <sub>2</sub> | OPO <sub>3</sub> H | C[S+](C)C(C)C(C)OP(=O)(O)[O-]             |
| 00237 | S(CH <sub>3</sub> ) <sub>2</sub> | (CH(CH <sub>3</sub> )) <sub>3</sub> | OPO <sub>3</sub> H | C[S+](C)C(C)C(C)C(C)OP(=O)(O)[O-]         |
| 00238 | S(CH <sub>3</sub> ) <sub>2</sub> | (CH(CH <sub>3</sub> )) <sub>4</sub> | OPO <sub>3</sub> H | C[S+](C)C(C)C(C)C(C)C(C)OP(=O)(O)[O-]     |
| 00239 | S(CH <sub>3</sub> ) <sub>2</sub> | (CH(CH <sub>3</sub> )) <sub>5</sub> | OPO <sub>3</sub> H | C[S+](C)C(C)C(C)C(C)C(C)C(C)OP(=O)(O)[O-] |

**Table S2.** Sample OPLS-AA compatible structure file (.gro) for molecule 00002 with chemical formula  $\text{N}(\text{CH}_3)_3(\text{CH}_2)_2\text{CO}_2$ .

```
00002
  22
  100002 C00 1 0.708 0.524 0.518
  100002 N01 2 0.559 0.524 0.518
  100002 C02 3 0.512 0.524 0.659
  100002 C03 4 0.515 0.650 0.450
  100002 C04 5 0.516 0.398 0.447
  100002 C05 6 0.367 0.359 0.457
  100002 C06 7 0.275 0.472 0.420
  100002 O07 8 0.287 0.516 0.304
  100002 O08 9 0.211 0.525 0.513
  100002 H09 10 0.749 0.610 0.569
  100002 H0A 11 0.747 0.524 0.416
  100002 H0B 12 0.749 0.435 0.568
  100002 H0C 13 0.551 0.608 0.716
  100002 H0D 14 0.539 0.431 0.711
  100002 H0E 15 0.403 0.530 0.665
  100002 H0F 16 0.573 0.738 0.479
  100002 H0G 17 0.412 0.674 0.472
  100002 H0H 18 0.519 0.640 0.341
  100002 H0I 19 0.574 0.312 0.482
  100002 H0J 20 0.539 0.407 0.341
  100002 H0K 21 0.341 0.324 0.557
  100002 H0M 22 0.345 0.276 0.390
1.00000 1.00000 1.00000
```

**Table S3.** Sample OPLS-AA<sup>4</sup> compatible topology file (.itp) for molecule 00002 with chemical formula N(CH<sub>3</sub>)<sub>3</sub>(CH<sub>2</sub>)<sub>2</sub>CO<sub>2</sub>.

```
[ atomtypes ]
opls_807 O807 15.9990 0.000 A 2.96000E-01 8.78640E-01
opls_818 H818 1.0080 0.000 A 2.50000E-01 1.25520E-01
opls_808 O808 15.9990 0.000 A 2.96000E-01 8.78640E-01
opls_813 H813 1.0080 0.000 A 2.50000E-01 1.25520E-01
opls_802 C802 12.0110 0.000 A 3.50000E-01 2.76144E-01
opls_815 H815 1.0080 0.000 A 2.50000E-01 1.25520E-01
opls_801 N801 14.0070 0.000 A 3.25000E-01 7.11280E-01
opls_803 C803 12.0110 0.000 A 3.50000E-01 2.76144E-01
opls_814 H814 1.0080 0.000 A 2.50000E-01 1.25520E-01
opls_821 H821 1.0080 0.000 A 2.50000E-01 1.25520E-01
opls_820 H820 1.0080 0.000 A 2.50000E-01 1.25520E-01
opls_811 H811 1.0080 0.000 A 2.50000E-01 1.25520E-01
opls_810 H810 1.0080 0.000 A 2.50000E-01 1.25520E-01
opls_816 H816 1.0080 0.000 A 2.50000E-01 1.25520E-01
opls_800 C800 12.0110 0.000 A 3.50000E-01 2.76144E-01
opls_805 C805 12.0110 0.000 A 3.50000E-01 2.76144E-01
opls_806 C806 12.0110 0.000 A 3.55000E-01 2.92880E-01
opls_819 H819 1.0080 0.000 A 2.50000E-01 1.25520E-01
opls_804 C804 12.0110 0.000 A 3.50000E-01 2.76144E-01
opls_817 H817 1.0080 0.000 A 2.50000E-01 1.25520E-01
opls_812 H812 1.0080 0.000 A 2.50000E-01 1.25520E-01
opls_809 H809 1.0080 0.000 A 2.50000E-01 1.25520E-01
[ moleculetype ]
; Name nrexcl
00002 3
[ atoms ]
1 opls_800 1 00002 C00 1 -0.142484 12.0110
2 opls_801 1 00002 N01 1 0.300727 14.0070
3 opls_802 1 00002 C02 1 -0.108037 12.0110
4 opls_803 1 00002 C03 1 0.035732 12.0110
5 opls_804 1 00002 C04 1 0.268680 12.0110
6 opls_805 1 00002 C05 1 -0.234254 12.0110
7 opls_806 1 00002 C06 1 0.752400 12.0110
8 opls_807 1 00002 O07 1 -0.671895 15.9990
9 opls_808 1 00002 O08 1 -0.692406 15.9990
10 opls_809 1 00002 H09 1 0.079946 1.0080
11 opls_810 1 00002 H0A 1 0.049012 1.0080
12 opls_811 1 00002 H0B 1 0.080555 1.0080
13 opls_812 1 00002 H0C 1 0.037719 1.0080
14 opls_813 1 00002 H0D 1 0.041116 1.0080
15 opls_814 1 00002 H0E 1 0.112866 1.0080
16 opls_815 1 00002 H0F 1 0.024096 1.0080
17 opls_816 1 00002 H0G 1 0.049359 1.0080
18 opls_817 1 00002 H0H 1 0.026839 1.0080
19 opls_818 1 00002 H0I 1 -0.036574 1.0080
20 opls_819 1 00002 H0J 1 -0.023940 1.0080
21 opls_820 1 00002 H0K 1 0.011666 1.0080
22 opls_821 1 00002 H0M 1 0.038878 1.0080
[ bonds ]
2 1 1 0.1471 307105.600
3 2 1 0.1471 307105.600
4 2 1 0.1471 307105.600
5 2 1 0.1471 307105.600
6 5 1 0.1529 224262.400
7 6 1 0.1522 265265.600
8 7 1 0.1250 548940.800
9 7 1 0.1250 548940.800
10 1 1 0.1090 284512.000
```

```

11      1      1      0.1090 284512.000
12      1      1      0.1090 284512.000
13      3      1      0.1090 284512.000
14      3      1      0.1090 284512.000
15      3      1      0.1090 284512.000
16      4      1      0.1090 284512.000
17      4      1      0.1090 284512.000
18      4      1      0.1090 284512.000
19      5      1      0.1090 284512.000
20      5      1      0.1090 284512.000
21      6      1      0.1090 284512.000
22      6      1      0.1090 284512.000
[ angles ]
; ai    aj    ak  funct          c0          c1          c2          c3
  1     2     3    1    113.000    418.400
  1     2     4    1    113.000    418.400
  1     2     5    1    113.000    418.400
  2     5     6    1    111.200    669.440
  5     6     7    1    111.100    527.184
  6     7     8    1    117.000    585.760
  6     7     9    1    117.000    585.760
  2     1    10    1    109.500    292.880
  2     1    11    1    109.500    292.880
  2     1    12    1    109.500    292.880
  2     3    13    1    109.500    292.880
  2     3    14    1    109.500    292.880
  2     3    15    1    109.500    292.880
  2     4    16    1    109.500    292.880
  2     4    17    1    109.500    292.880
  2     4    18    1    109.500    292.880
  2     5    19    1    109.500    292.880
  2     5    20    1    109.500    292.880
  5     6    21    1    110.700    313.800
  5     6    22    1    110.700    313.800
 13     3    15    1    107.800    276.144
  7     6    22    1    109.500    292.880
 21     6    22    1    107.800    276.144
  6     5    19    1    110.700    313.800
  8     7     9    1    126.000    669.440
 17     4    18    1    107.800    276.144
 16     4    17    1    107.800    276.144
  6     5    20    1    110.700    313.800
 19     5    20    1    107.800    276.144
 11     1    12    1    107.800    276.144
  3     2     4    1    113.000    418.400
 13     3    14    1    107.800    276.144
  3     2     5    1    113.000    418.400
  4     2     5    1    113.000    418.400
 16     4    18    1    107.800    276.144
 10     1    12    1    107.800    276.144
 10     1    11    1    107.800    276.144
 14     3    15    1    107.800    276.144
  7     6    21    1    109.500    292.880
[ dihedrals ]
; IMPROPER DIHEDRAL ANGLES
; ai    aj    ak    al  funct          c0          c1          c2          c3
c4      8     7    c5     6     4    180.000    43.932    2
[ dihedrals ]
; PROPER DIHEDRAL ANGLES
; ai    aj    ak    al  funct          c0          c1          c2          c3
c4      7     6     5     2     3    -8.786    23.849    -8.368    -6.694    -0.000    0.000

```

|    |   |   |    |   |        |        |        |         |        |       |
|----|---|---|----|---|--------|--------|--------|---------|--------|-------|
| 6  | 5 | 2 | 1  | 3 | 3.042  | -1.351 | 0.519  | -2.209  | -0.000 | 0.000 |
| 6  | 5 | 2 | 4  | 3 | 3.042  | -1.351 | 0.519  | -2.209  | -0.000 | 0.000 |
| 6  | 5 | 2 | 3  | 3 | 3.042  | -1.351 | 0.519  | -2.209  | -0.000 | 0.000 |
| 21 | 6 | 7 | 8  | 3 | 0.000  | 0.000  | 0.000  | -0.000  | -0.000 | 0.000 |
| 22 | 6 | 7 | 8  | 3 | 0.000  | 0.000  | 0.000  | -0.000  | -0.000 | 0.000 |
| 21 | 6 | 7 | 9  | 3 | 0.000  | 0.000  | 0.000  | -0.000  | -0.000 | 0.000 |
| 22 | 6 | 7 | 9  | 3 | 0.000  | 0.000  | 0.000  | -0.000  | -0.000 | 0.000 |
| 20 | 5 | 6 | 7  | 3 | -0.209 | -0.628 | 0.000  | 0.837   | -0.000 | 0.000 |
| 19 | 5 | 6 | 7  | 3 | -0.209 | -0.628 | 0.000  | 0.837   | -0.000 | 0.000 |
| 22 | 6 | 5 | 19 | 3 | 0.628  | 1.883  | 0.000  | -2.510  | -0.000 | 0.000 |
| 21 | 6 | 5 | 20 | 3 | 0.628  | 1.883  | 0.000  | -2.510  | -0.000 | 0.000 |
| 22 | 6 | 5 | 20 | 3 | 0.628  | 1.883  | 0.000  | -2.510  | -0.000 | 0.000 |
| 21 | 6 | 5 | 19 | 3 | 0.628  | 1.883  | 0.000  | -2.510  | -0.000 | 0.000 |
| 21 | 6 | 5 | 2  | 3 | 0.803  | 2.410  | 0.000  | -3.213  | -0.000 | 0.000 |
| 22 | 6 | 5 | 2  | 3 | 0.803  | 2.410  | 0.000  | -3.213  | -0.000 | 0.000 |
| 13 | 3 | 2 | 5  | 3 | 0.632  | 1.895  | 0.000  | -2.527  | -0.000 | 0.000 |
| 17 | 4 | 2 | 5  | 3 | 0.632  | 1.895  | 0.000  | -2.527  | -0.000 | 0.000 |
| 12 | 1 | 2 | 5  | 3 | 0.632  | 1.895  | 0.000  | -2.527  | -0.000 | 0.000 |
| 14 | 3 | 2 | 5  | 3 | 0.632  | 1.895  | 0.000  | -2.527  | -0.000 | 0.000 |
| 12 | 1 | 2 | 4  | 3 | 0.632  | 1.895  | 0.000  | -2.527  | -0.000 | 0.000 |
| 11 | 1 | 2 | 5  | 3 | 0.632  | 1.895  | 0.000  | -2.527  | -0.000 | 0.000 |
| 10 | 1 | 2 | 5  | 3 | 0.632  | 1.895  | 0.000  | -2.527  | -0.000 | 0.000 |
| 18 | 4 | 2 | 5  | 3 | 0.632  | 1.895  | 0.000  | -2.527  | -0.000 | 0.000 |
| 11 | 1 | 2 | 4  | 3 | 0.632  | 1.895  | 0.000  | -2.527  | -0.000 | 0.000 |
| 20 | 5 | 2 | 4  | 3 | 0.632  | 1.895  | 0.000  | -2.527  | -0.000 | 0.000 |
| 19 | 5 | 2 | 3  | 3 | 0.632  | 1.895  | 0.000  | -2.527  | -0.000 | 0.000 |
| 20 | 5 | 2 | 3  | 3 | 0.632  | 1.895  | 0.000  | -2.527  | -0.000 | 0.000 |
| 16 | 4 | 2 | 3  | 3 | 0.632  | 1.895  | 0.000  | -2.527  | -0.000 | 0.000 |
| 13 | 3 | 2 | 4  | 3 | 0.632  | 1.895  | 0.000  | -2.527  | -0.000 | 0.000 |
| 16 | 4 | 2 | 5  | 3 | 0.632  | 1.895  | 0.000  | -2.527  | -0.000 | 0.000 |
| 14 | 3 | 2 | 4  | 3 | 0.632  | 1.895  | 0.000  | -2.527  | -0.000 | 0.000 |
| 10 | 1 | 2 | 3  | 3 | 0.632  | 1.895  | 0.000  | -2.527  | -0.000 | 0.000 |
| 11 | 1 | 2 | 3  | 3 | 0.632  | 1.895  | 0.000  | -2.527  | -0.000 | 0.000 |
| 12 | 1 | 2 | 3  | 3 | 0.632  | 1.895  | 0.000  | -2.527  | -0.000 | 0.000 |
| 13 | 3 | 2 | 1  | 3 | 0.632  | 1.895  | 0.000  | -2.527  | -0.000 | 0.000 |
| 14 | 3 | 2 | 1  | 3 | 0.632  | 1.895  | 0.000  | -2.527  | -0.000 | 0.000 |
| 15 | 3 | 2 | 1  | 3 | 0.632  | 1.895  | 0.000  | -2.527  | -0.000 | 0.000 |
| 17 | 4 | 2 | 3  | 3 | 0.632  | 1.895  | 0.000  | -2.527  | -0.000 | 0.000 |
| 17 | 4 | 2 | 1  | 3 | 0.632  | 1.895  | 0.000  | -2.527  | -0.000 | 0.000 |
| 16 | 4 | 2 | 1  | 3 | 0.632  | 1.895  | 0.000  | -2.527  | -0.000 | 0.000 |
| 19 | 5 | 2 | 1  | 3 | 0.632  | 1.895  | 0.000  | -2.527  | -0.000 | 0.000 |
| 20 | 5 | 2 | 1  | 3 | 0.632  | 1.895  | 0.000  | -2.527  | -0.000 | 0.000 |
| 15 | 3 | 2 | 5  | 3 | 0.632  | 1.895  | 0.000  | -2.527  | -0.000 | 0.000 |
| 15 | 3 | 2 | 4  | 3 | 0.632  | 1.895  | 0.000  | -2.527  | -0.000 | 0.000 |
| 10 | 1 | 2 | 4  | 3 | 0.632  | 1.895  | 0.000  | -2.527  | -0.000 | 0.000 |
| 18 | 4 | 2 | 3  | 3 | 0.632  | 1.895  | 0.000  | -2.527  | -0.000 | 0.000 |
| 19 | 5 | 2 | 4  | 3 | 0.632  | 1.895  | 0.000  | -2.527  | -0.000 | 0.000 |
| 18 | 4 | 2 | 1  | 3 | 0.632  | 1.895  | 0.000  | -2.527  | -0.000 | 0.000 |
| 9  | 7 | 6 | 5  | 3 | 7.008  | 8.473  | -4.184 | -11.297 | -0.000 | 0.000 |
| 8  | 7 | 6 | 5  | 3 | 7.008  | 8.473  | -4.184 | -11.297 | -0.000 | 0.000 |

[ pairs ]

|   |    |   |
|---|----|---|
| 1 | 6  | 1 |
| 3 | 6  | 1 |
| 2 | 7  | 1 |
| 4 | 6  | 1 |
| 5 | 8  | 1 |
| 3 | 10 | 1 |
| 5 | 9  | 1 |
| 4 | 10 | 1 |
| 3 | 11 | 1 |
| 1 | 13 | 1 |
| 5 | 10 | 1 |
| 4 | 11 | 1 |

|    |    |   |
|----|----|---|
| 3  | 12 | 1 |
| 1  | 14 | 1 |
| 5  | 11 | 1 |
| 4  | 12 | 1 |
| 1  | 15 | 1 |
| 5  | 12 | 1 |
| 4  | 13 | 1 |
| 1  | 16 | 1 |
| 5  | 13 | 1 |
| 4  | 14 | 1 |
| 1  | 17 | 1 |
| 5  | 14 | 1 |
| 4  | 15 | 1 |
| 3  | 16 | 1 |
| 1  | 18 | 1 |
| 5  | 15 | 1 |
| 3  | 17 | 1 |
| 1  | 19 | 1 |
| 5  | 16 | 1 |
| 3  | 18 | 1 |
| 1  | 20 | 1 |
| 5  | 17 | 1 |
| 3  | 19 | 1 |
| 5  | 18 | 1 |
| 4  | 19 | 1 |
| 3  | 20 | 1 |
| 2  | 21 | 1 |
| 4  | 20 | 1 |
| 2  | 22 | 1 |
| 7  | 19 | 1 |
| 7  | 20 | 1 |
| 8  | 21 | 1 |
| 9  | 21 | 1 |
| 8  | 22 | 1 |
| 9  | 22 | 1 |
| 19 | 21 | 1 |
| 20 | 21 | 1 |
| 19 | 22 | 1 |
| 20 | 22 | 1 |

**Table S4.** Minimization simulation parameters. All unstated parameters are left as default GROMACS *mdrun* values.

| <b>Description</b>        | <b>Parameter value (s)</b> | <b>Units</b> |
|---------------------------|----------------------------|--------------|
| <b><u>Run control</u></b> |                            |              |
| integrator                | steep                      |              |
| emtol                     | 0.01                       | kJ/mol/nm    |
| emstep                    | 0.001                      | nm           |
| nsteps                    | 10000000                   | steps        |

**Table S5.** Isothermal-isobaric (NPT) ensemble simulation parameters. All unstated parameters are left as default GROMACS *mdrun* values.

| <b>Description</b>                 | <b>Parameter value (s)</b> | <b>Units</b>      |
|------------------------------------|----------------------------|-------------------|
| <b><u>Run control</u></b>          |                            |                   |
| integrator                         | md                         |                   |
| dt                                 | 0.0001                     | ps                |
| nsteps                             | 5000000                    | steps             |
| <b><u>Output control</u></b>       |                            |                   |
| nstxout                            | 10000                      | steps             |
| nstvout                            | 10000                      | steps             |
| nstenergy                          | 10000                      | steps             |
| nstlog                             | 10000                      | steps             |
| <b><u>Bonds</u></b>                |                            |                   |
| constraint_algorithm               | lincs                      |                   |
| <b><u>Neighbor searching</u></b>   |                            |                   |
| cutoff-scheme                      | Verlet                     |                   |
| ns_type                            | grid                       |                   |
| nstlist                            | 10                         | steps             |
| rlist                              | 1.0                        | nm                |
| <b><u>Velocity generation</u></b>  |                            |                   |
| gen-vel                            | yes                        |                   |
| gen-temp                           | 298                        | K                 |
| <b><u>Van der Waals</u></b>        |                            |                   |
| rvdw                               | 1.1                        | nm                |
| <b><u>Electrostatics</u></b>       |                            |                   |
| coulombtype                        | PME                        |                   |
| rcoulomb                           | 1.1                        | nm                |
| <b><u>Pressure coupling</u></b>    |                            |                   |
| pcoupl                             | Berendsen                  |                   |
| pcoupltype                         | isotropic                  |                   |
| tau_p                              | 0.5                        | ps                |
| ref_p                              | 1.0                        | bar               |
| compressibility                    | 4.5e-5                     | bar <sup>-1</sup> |
| refcoord_scaling                   | all                        |                   |
| <b><u>Temperature coupling</u></b> |                            |                   |
| tcoupl                             | Berendsen                  |                   |
| tc-grps                            | System                     |                   |
| tau_t                              | 0.1                        | ps                |
| ref_t                              | 298                        | bar               |



**Table S6.** Canonical (NVT) ensemble simulation parameters. All unstated parameters are left as default GROMACS *mdrun* values.

| <b>Description</b>                 | <b>Parameter value(s)</b> | <b>Units</b> |
|------------------------------------|---------------------------|--------------|
| <b><u>Run control</u></b>          |                           |              |
| integrator                         | md                        |              |
| dt                                 | 0.0005                    | ps           |
| nsteps                             | 20000000                  | steps        |
| <b><u>Output control</u></b>       |                           |              |
| nstxout                            | 20000                     | steps        |
| nstvout                            | 200000                    | steps        |
| nstenergy                          | 200000                    | steps        |
| nstlog                             | 200000                    | steps        |
| nstxout-compressed                 | 20000                     |              |
| <b><u>Bonds</u></b>                |                           |              |
| constraint_algorithm               | lincs                     |              |
| <b><u>Neighbor searching</u></b>   |                           |              |
| cutoff-scheme                      | Verlet                    |              |
| ns_type                            | grid                      |              |
| nstlist                            | 10                        | steps        |
| rlist                              | 1.0                       | nm           |
| <b><u>Velocity generation</u></b>  |                           |              |
| gen-vel                            | yes                       |              |
| gen-temp                           | 298                       | K            |
| <b><u>Van der Waals</u></b>        |                           |              |
| rvdw                               | 1.1                       | nm           |
| <b><u>Electrostatics</u></b>       |                           |              |
| coulombtype                        | PME                       |              |
| fourierspacing                     | 0.16                      | nm           |
| rcoulomb                           | 1.1                       | nm           |
| <b><u>Pressure coupling</u></b>    |                           |              |
| pcoupl                             | no                        |              |
| <b><u>Temperature coupling</u></b> |                           |              |
| tcoupl                             | V-rescale                 |              |
| tc-grps                            | System                    |              |
| tau_t                              | 0.1                       | ps           |
| ref_t                              | 298                       | bar          |

**Figure S3.** Distribution of association properties with changing zwitterion cation (a, c) and anion (b, d) subunit chemistries for interactions with water (a, b) and salt ions (c, d).

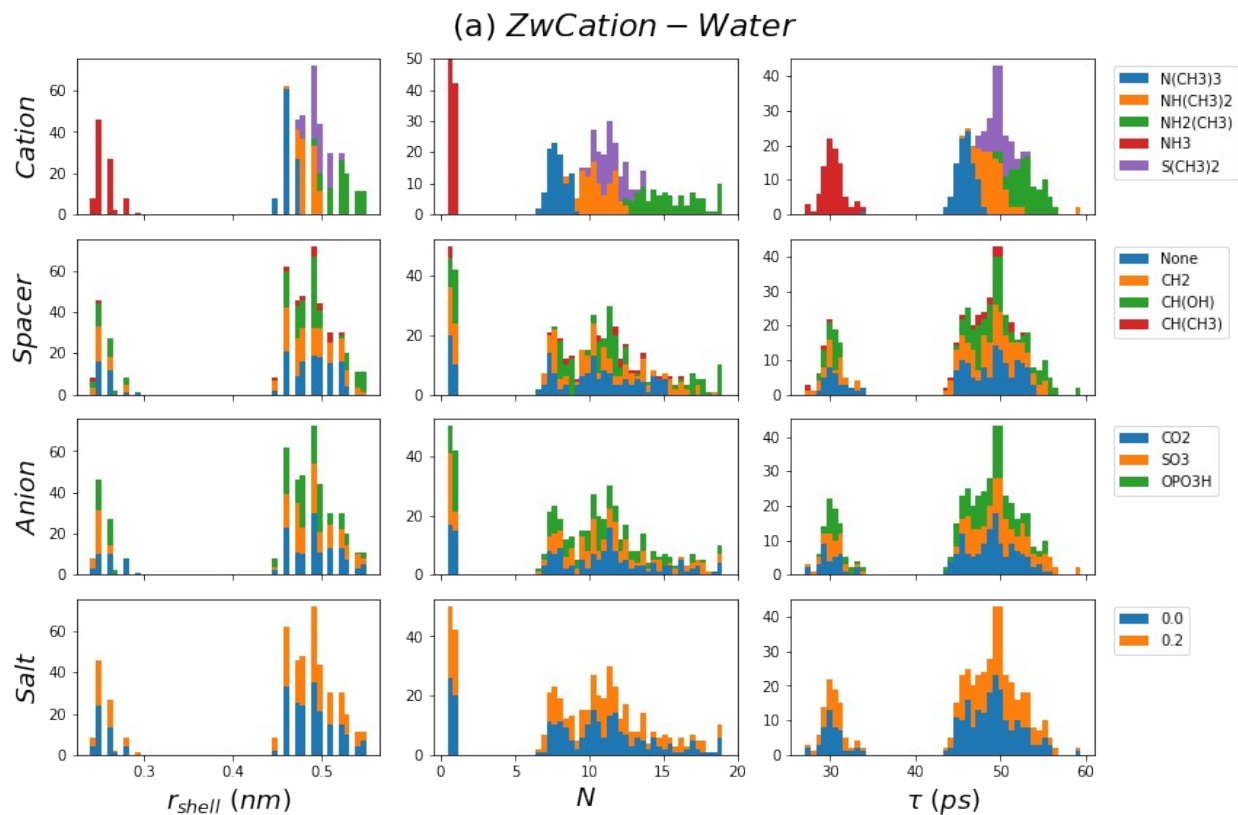

(b) *ZwAnion* – Water

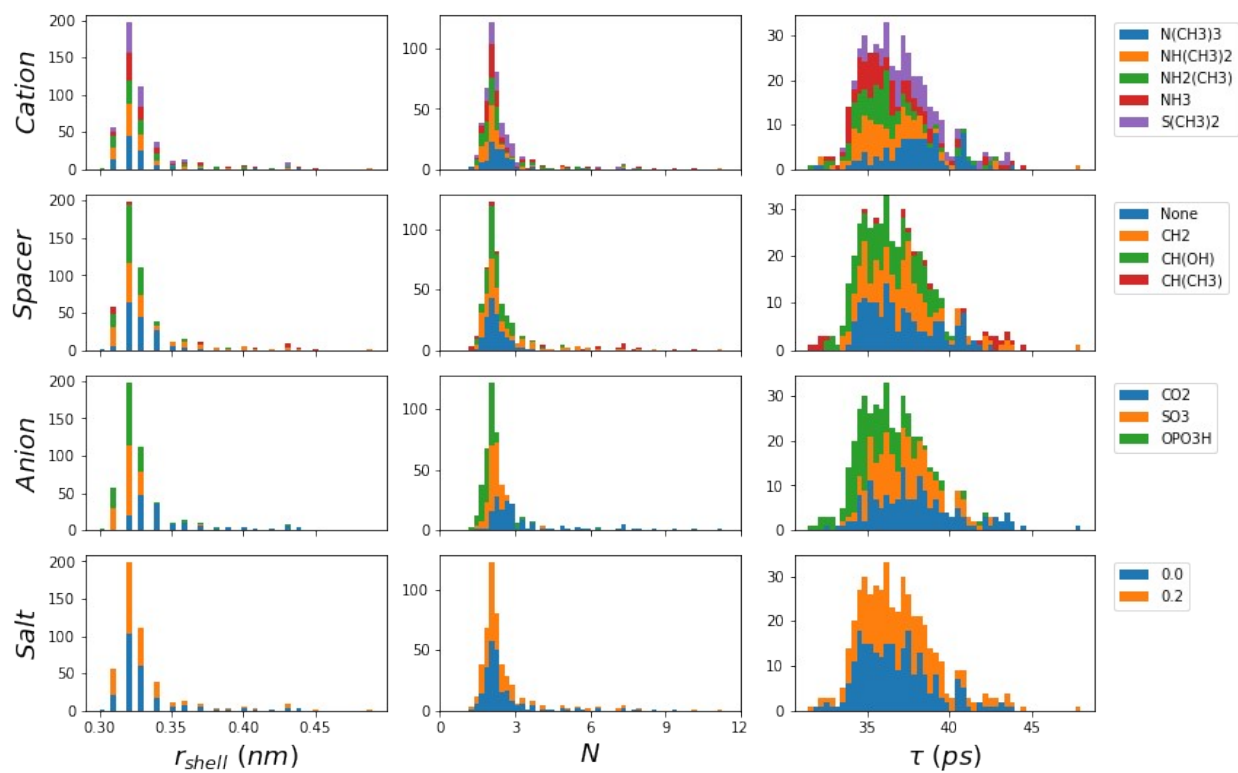

(c) *ZwCation* – Cl<sup>-</sup>

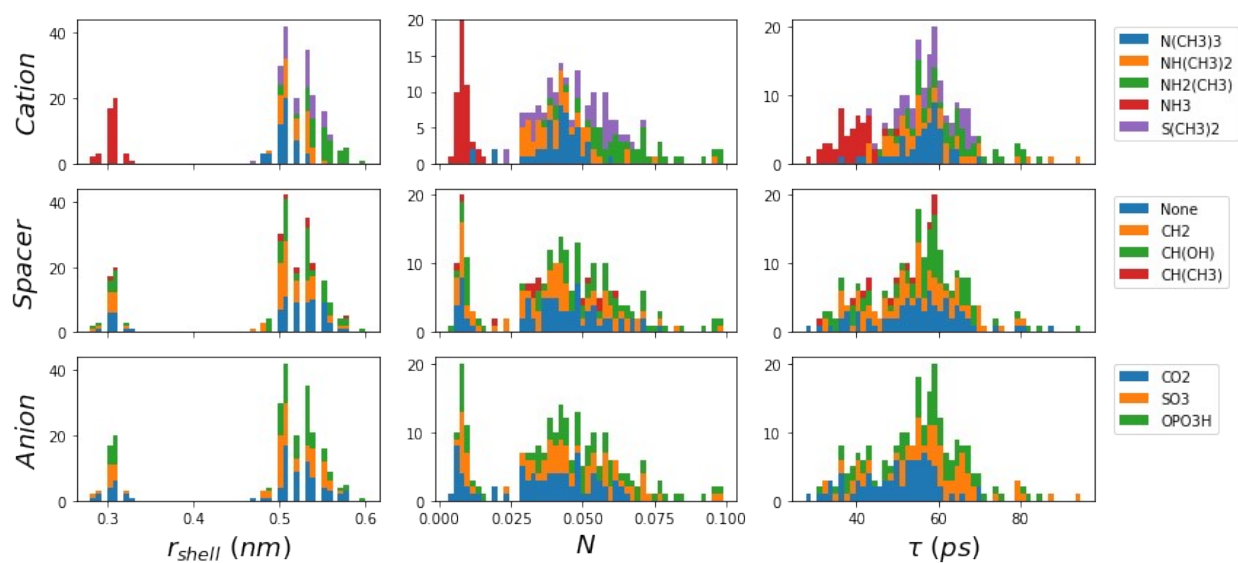

(d)  $ZwAnion - Na^+$

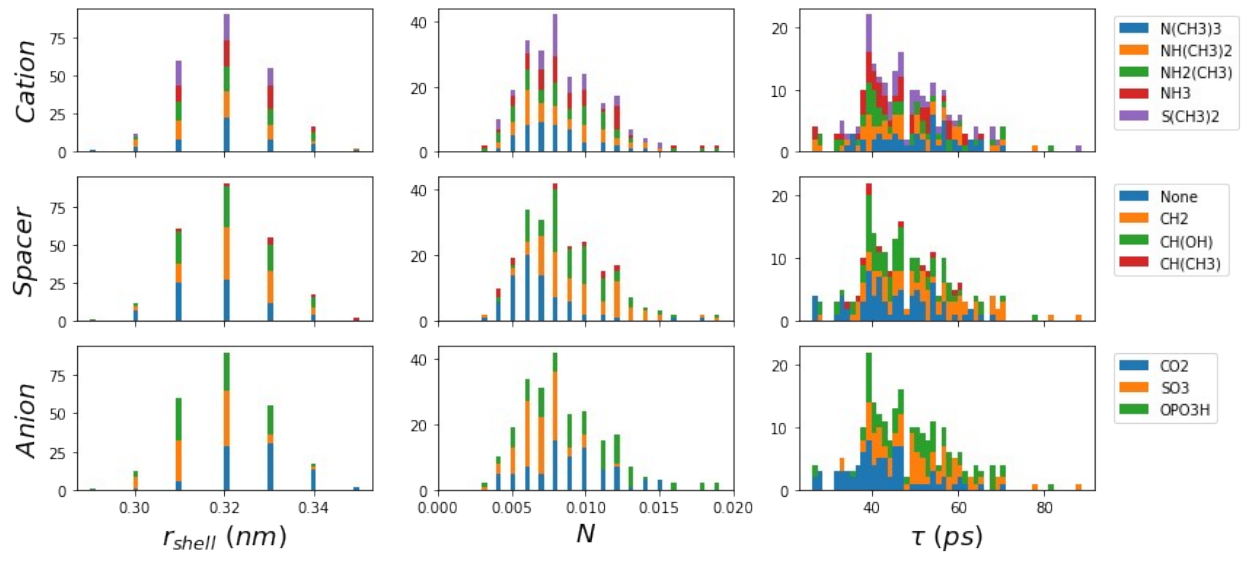

**Figure S4.** Correlation plots between the coordination shell radius and number of species within the coordination shell. The correlation coefficient,  $\rho$ , close to 1 implies a strong correlation.

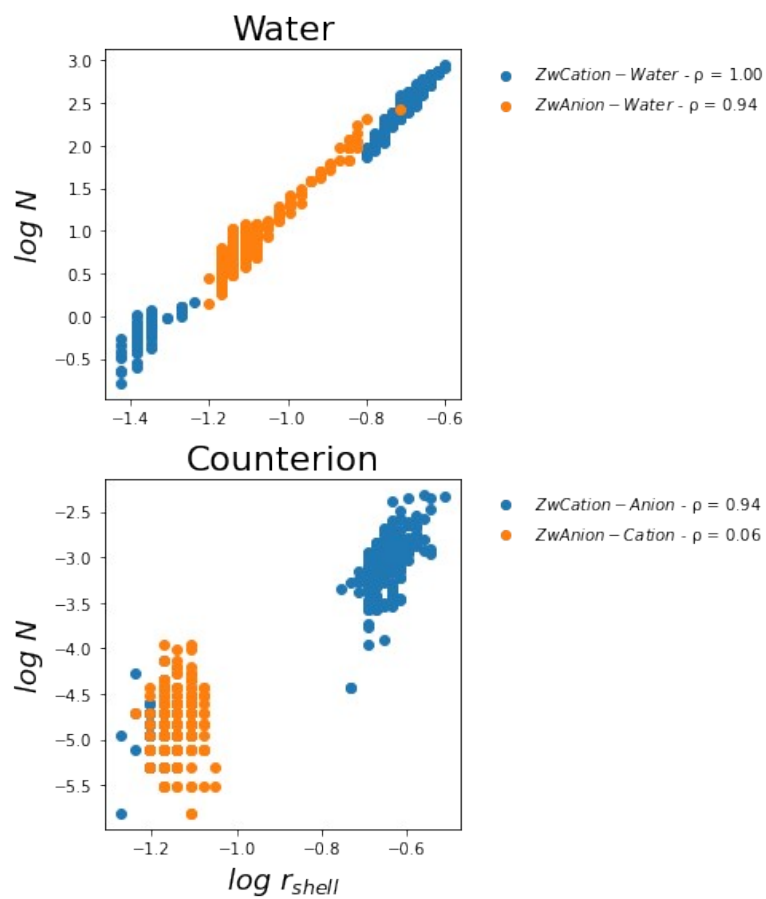

**Table S7.** p-values from MANOVA evaluated by Pillai's trace.  $\alpha$ -level of 0.05 used to determine statistical significance.

| <b>Factor</b> | <b>ZwCation-Water</b> | <b>ZwAnion-Water</b> | <b>ZwCation-Cl<sup>-</sup></b> | <b>ZwAnion-Na<sup>+</sup></b> |
|---------------|-----------------------|----------------------|--------------------------------|-------------------------------|
| Cation        | 0.0000                | 0.0000               | 0.0000                         | 0.0000                        |
| Spacer        | 0.0000                | 0.0000               | 0.0000                         | 0.0000                        |
| Anion         | 0.0000                | 0.0000               | 0.0000                         | 0.0000                        |
| CSL           | 0.0000                | 0.0000               | 0.0000                         | 0.0000                        |
| Salt          | 0.0015                | 0.0144               | 0.0000                         | 0.0000                        |

## References

1. Lindahl, Abraham, Hess & Spoel, van der. GROMACS 2020.6. (2020).
2. Shao, Q. & Jiang, S. Molecular understanding and design of zwitterionic materials. *Adv. Mater.* **27**, 15–26 (2015).
3. Dodda, L. S., De Vaca, I. C., Tirado-Rives, J. & Jorgensen, W. L. LigParGen web server: An automatic OPLS-AA parameter generator for organic ligands. *Nucleic Acids Res.* **45**, W331–W336 (2017).
4. Jorgensen, W. L., Maxwell, D. S. & Tirado-Rives, J. Development and testing of the OPLS all-atom force field on conformational energetics and properties of organic liquids. *J. Am. Chem. Soc.* **118**, 11225–11236 (1996).
